# Supplementary material for: Modeling and Optimizing the Synthesis of Urea-formaldehyde Fertilizers and Analyses of Factors Affecting these Processes
Source: PubMed Central journal article supplement (PMC5852125; doi:10.1038/s41598-018-22698-8), 2018-03-14
Supplement: 41598_2018_22698_MOESM1_ESM.pdf [file 41598_2018_22698_MOESM1_ESM.pdf]

## Supporting Information

**Title: Modeling and Optimizing the Synthesis of Urea-formaldehyde Fertilizers  
and Analyses of Factors Affecting these Processes**

**Authors: Yanle Guo<sup>1</sup>, Min Zhang<sup>1,2\*</sup>, Zhiguang Liu<sup>1\*</sup>, Xiaofei Tian<sup>1</sup>, Shugang  
Zhang<sup>1</sup>, Chenhao Zhao<sup>1</sup>, Hao Lu<sup>1</sup>**

<sup>1</sup>National Engineering Laboratory for Efficient Utilization of Soil and Fertilizer  
Resources, National Engineering and Technology Research Center for Slow and  
Controlled Release Fertilizers, College of Resources and Environment, Shandong  
Agricultural University, Taian, Shandong, 271018, China.

<sup>2</sup>State Key Laboratory of Nutrition Resources Integrated Utilization, Kingenta  
Ecological Engineering Group Co., Ltd. Linshu 276700, China.

Key words: urea-formaldehyde, response surface methodology, mathematical model,  
optimization

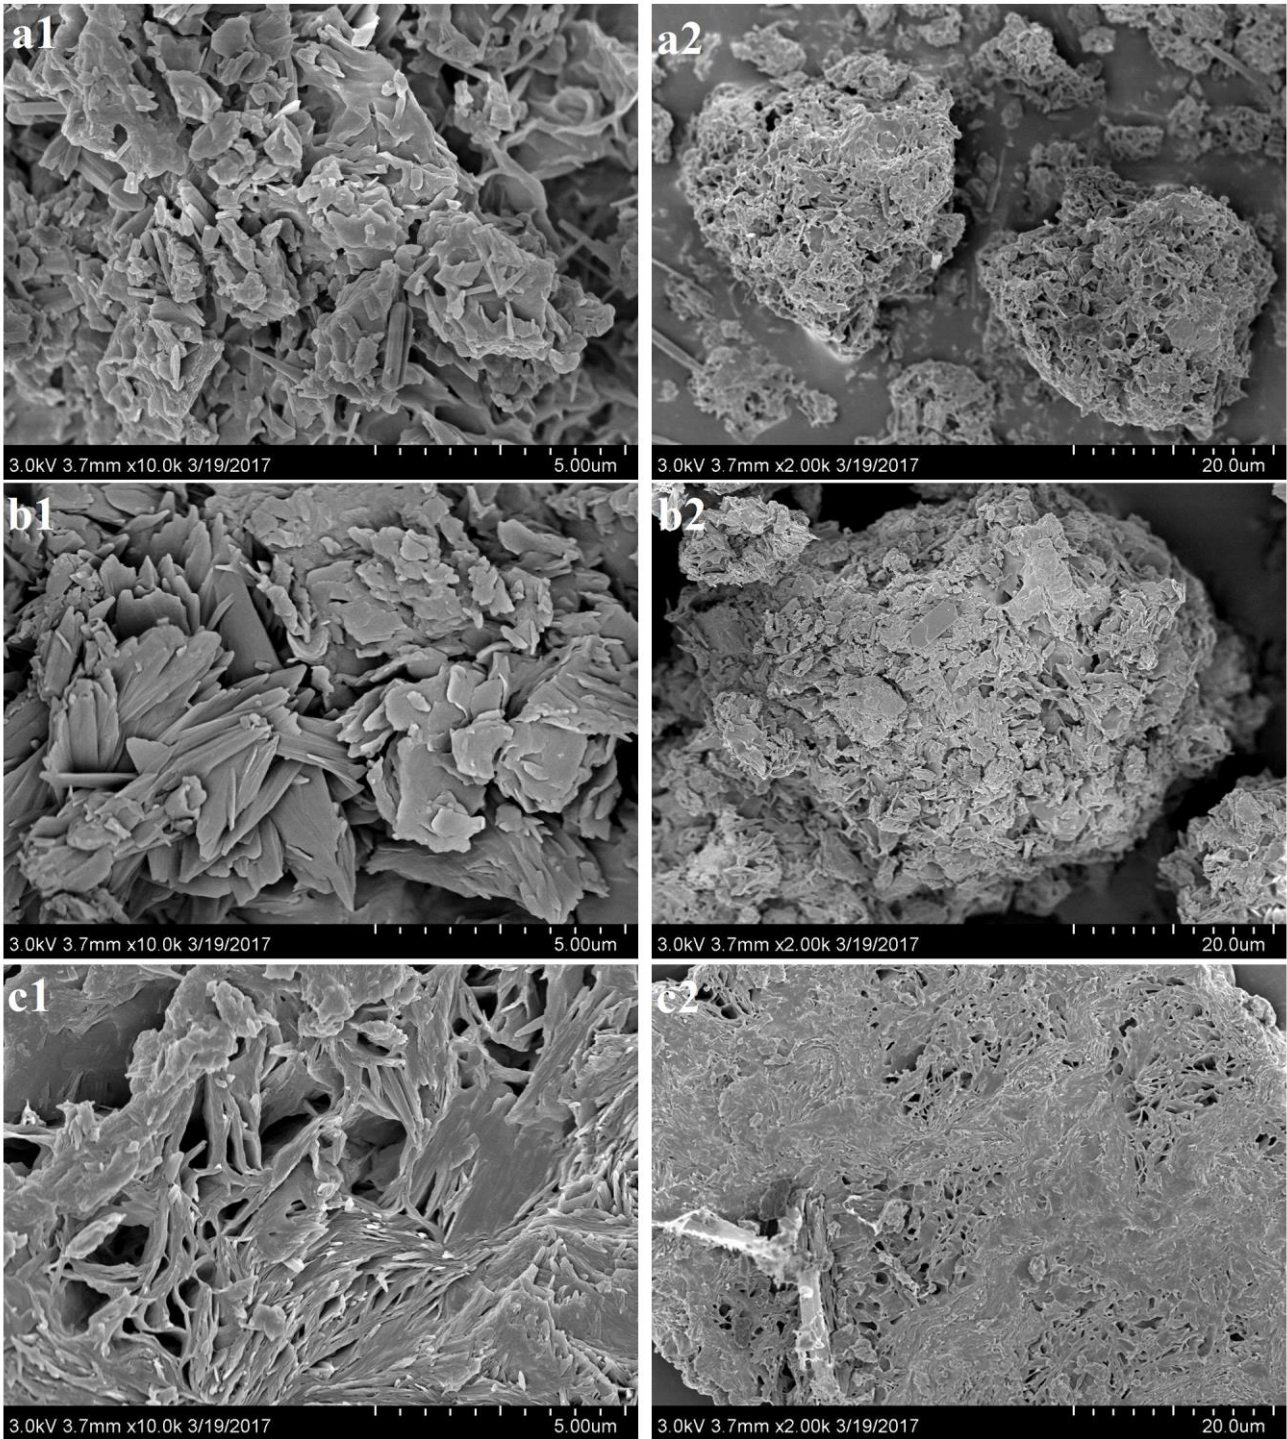

16 **Fig.S1 Scanning electron microscope images of urea-formaldehyde fertilizer (a.**

17 **Sample of Trial 1; b. Sample of Trial 8; c. Sample of Trial 11)**
